# Supplementary material for: Clinical Usefulness of a New Equation for Estimating Body Fat
Source: Oxford University Press journal article supplement (doi:10.2337/dc11-1334), 2011-12-17
Supplement: dc111334supplementarydata2.xls [file dc111334supplementarydata2.xls]

## Sheet: English
CUN-BAE (Clinica Universidad de Navarra - Body Adiposity Estimator)
Prediction equation published in Int J Obes 2011
			Fill in the marked boxes
	Age	years
	Sex	male=0; female=1
	Height	m
	Weight	kg
	BMI	kg/m2	#DIV/0!
					Predicted Body Fat%
					#DIV/0!	%
	Body fat % ranges		Males		Females
		Lean	up to 20.0%		up to 30.0%
		Overweight	20.1 - 25.0%		30.1 - 35.0%
		Obese	above 25.1%		above 35.1%
	These ranges are the most frequently used body fat ranges for Caucasians
Gómez-Ambrosi J, Silva C, Galofré JC, Escalada J, Santos S, Millán D, Vila N, Ibañez P, Gil MJ, Valentí V, Rotellar F, Ramírez B, Salvador J, Frühbeck G.
Body mass index classification misses subjects with increased cardiometabolic risk factors related to elevated adiposity. Int J Obes 2011;in press.

## Sheet: Spanish
CUN-BAE (Clinica Universidad de Navarra - Estimador de grasa corporal)
Ecuación predictora publicada en Int J Obes 2011
			Rellene los recuadros marcados
	Edad	años
	Sexo	hombre=0; mujer=1
	Altura	m
	Peso	kg
	IMC	kg/m2	#DIV/0!
			Porcentaje de grasa corporal estimada
					#DIV/0!	%
	Rangos de % de grasa		Hombres		Mujeres
		Normopeso	hasta 20.0%		hasta 30.0%
		Sobrepeso	20.1 - 25.0%		30.1 - 35.0%
		Obesidad	mayor de 25.1%		mayor de 35.1%
	Estos rangos son los más frecuentemente utilizados para sujetos caucásicos
Gómez-Ambrosi J, Silva C, Galofré JC, Escalada J, Santos S, Millán D, Vila N, Ibañez P, Gil MJ, Valentí V, Rotellar F, Ramírez B, Salvador J, Frühbeck G.
Body mass index classification misses subjects with increased cardiometabolic risk factors related to elevated adiposity. Int J Obes 2011;in press.
